# Supplementary material for: Synthesis, Crystal Structures, Genotoxicity, and Antifungal and Antibacterial Studies of Ni(II) and Cd(II) Pyrazole Amide Coordination Complexes
Source: MDPI journal article supplement (doi:10.3390/molecules29051186), 2024-03-06
Supplement: s1 [file s1]

## **Electronic Supplementary Information (ESI)**

# **Synthesis, Crystal Structures, Genotoxicity, and Antifungal and Antibacterial Studies of Ni(II) and Cd(II) Pyrazole Amide Coordination Complexes**

**Amal El Mahdaoui,<sup>1</sup> Smaail Radi,<sup>1\*</sup> Youssef Draoui,<sup>1</sup> Mohamed El Massaoudi,<sup>1</sup> Sabir Ouahhoud,<sup>2,3</sup> Abdeslam Asehraou,<sup>2</sup> Nour eddine Bentouhami,<sup>2</sup> Ennouamane Saalaoui,<sup>2</sup> Redouane Benabbes,<sup>2</sup> Koen Robeyns,<sup>4</sup> Yann Garcia,<sup>4\*</sup>**

<sup>1</sup> LCAE, Department of Chemistry, Faculty of Sciences, University Mohammed I, Oujda 60 000, Morocco. E-mail: s.radi@ump.ac.ma

<sup>2</sup> Laboratory of Bioresource Biotechnology Ethnopharmacology and Health Faculty of Sciences, University Mohammed I, Oujda 60 000, Morocco. a.asehraou@ump.ac.ma

<sup>3</sup> Faculty of Medicine and Pharmacy, University Sultan Moulay Slimane, Beni Mellal, 23000, Morocco.

<sup>4</sup> Institute of Condensed Matter and Nanosciences, Molecular Chemistry, Materials and Catalysis (IMCN/MOST), Université catholique de Louvain, Place Louis Pasteur 1, 1348 Louvain-la-Neuve, Belgium. E-mail: yann.garcia@uclouvain.be

## **Contents:**

- **Figure S1.** <sup>1</sup>H NMR spectrum of **L<sub>1</sub>**
- **Figure S2.** <sup>13</sup>C NMR spectrum of **L<sub>1</sub>**
- **Figure S3.** <sup>1</sup>H NMR spectrum of **L<sub>2</sub>**
- **Figure S4.** <sup>13</sup>C NMR spectrum of **L<sub>2</sub>**
- **Figure S5.** Mass spectroscopy analysis of **L<sub>1</sub>**
- **Figure S6.** Mass spectroscopy analysis of **L<sub>2</sub>**
- **Figure S7.** Mass spectroscopy analysis of **C<sub>1</sub>**
- **Figure S8.** Mass spectroscopy analysis of **C<sub>2</sub>**

**Figure S1.**  $^1\text{H}$  NMR spectrum of **L**<sub>1</sub>

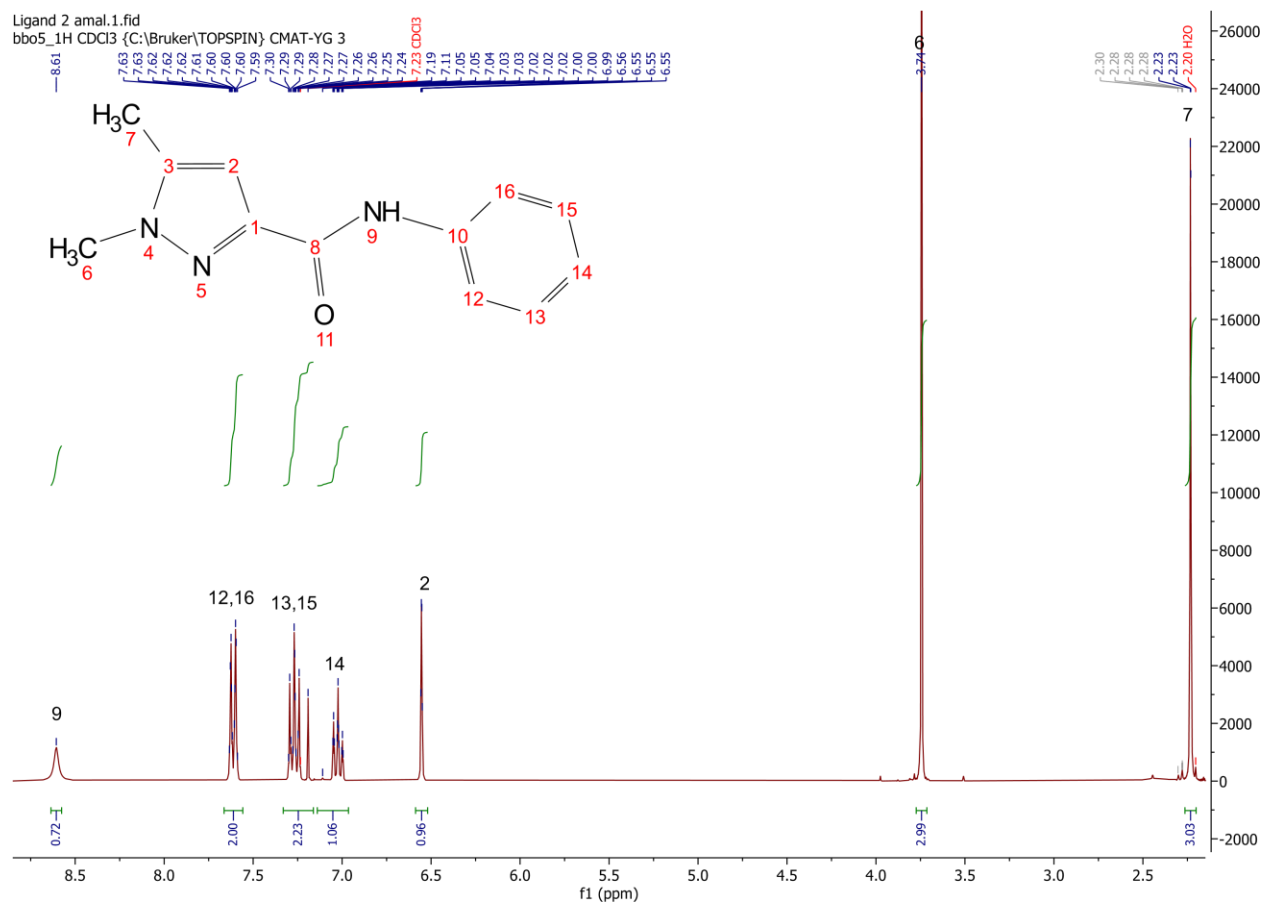

**Figure S2.**  $^{13}\text{C}$  NMR spectrum of **L**<sub>1</sub>

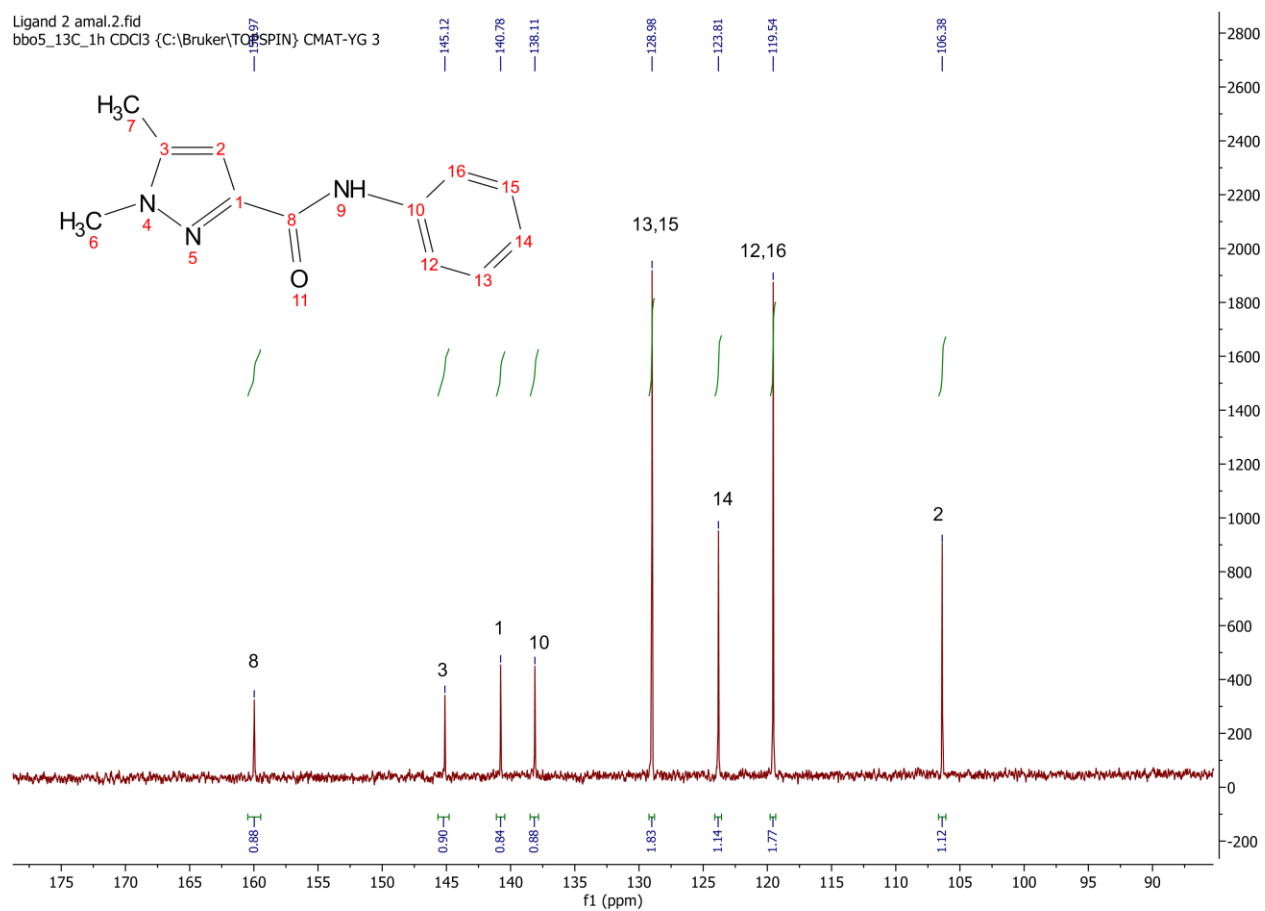

**Figure S3.**  $^1\text{H}$  NMR spectrum of **L**<sub>2</sub>

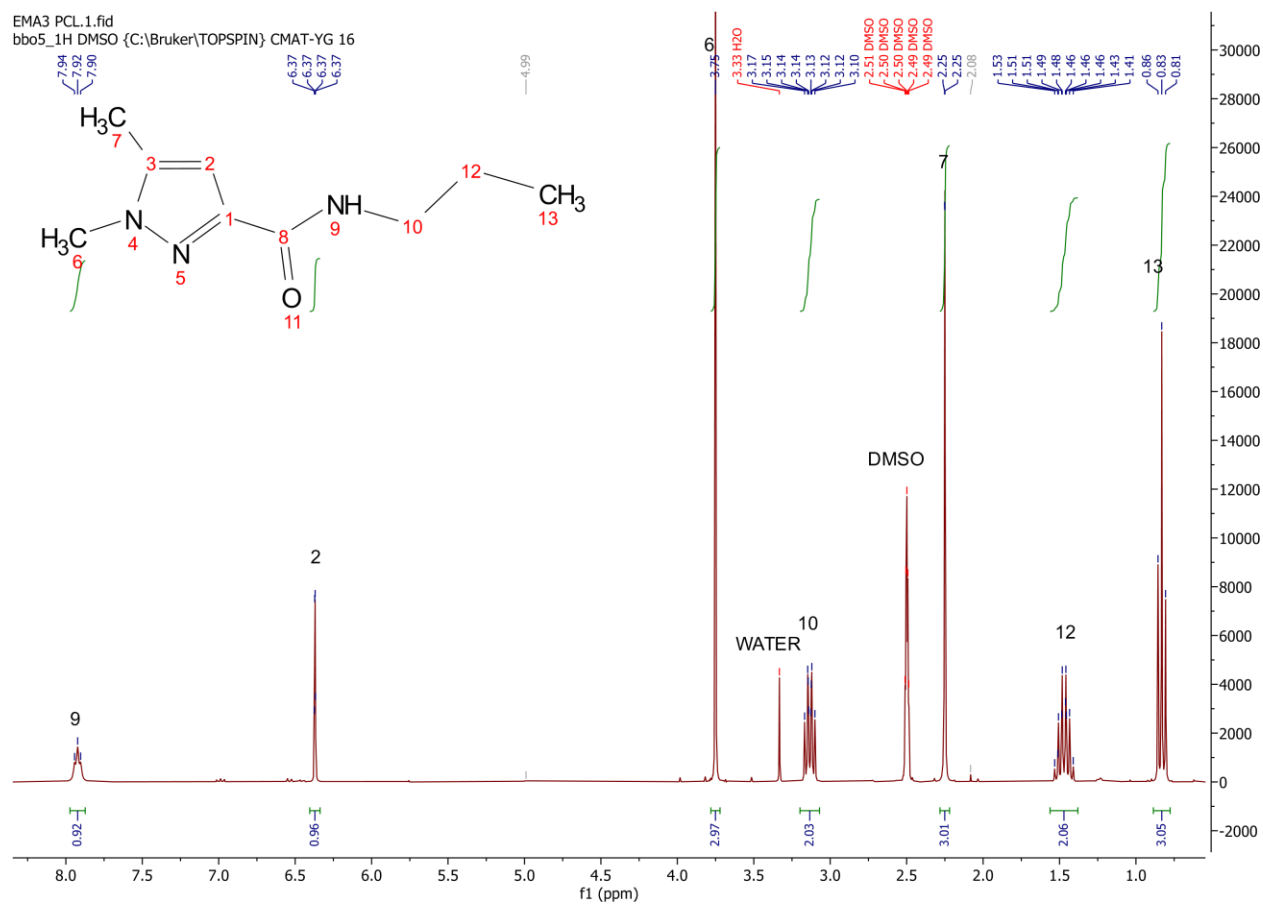

**Figure S4.**  $^{13}\text{C}$  NMR spectrum of **L2**

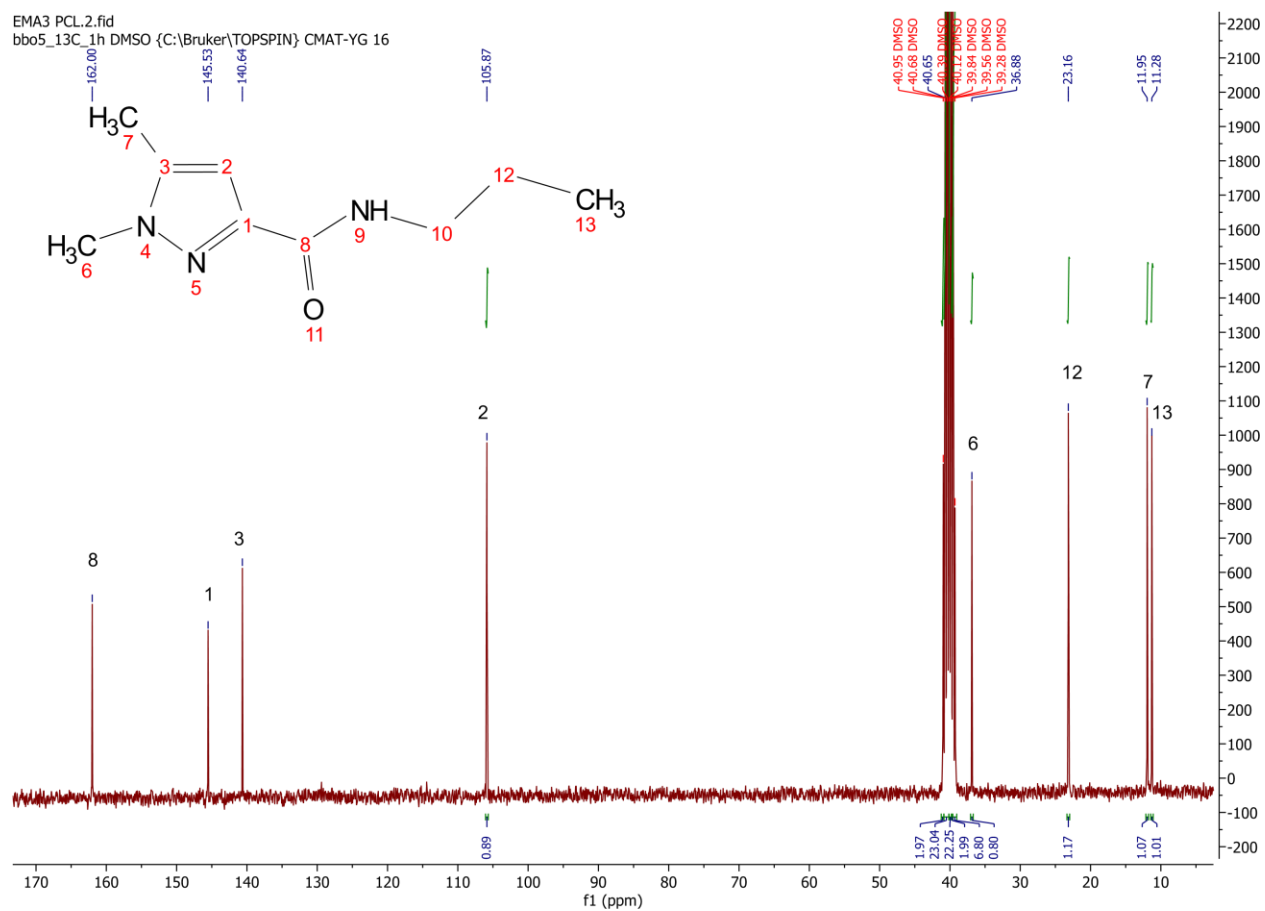

**Figure S5.** Mass spectroscopy analysis of L<sub>1</sub>

GN-L2 #132-212 RT: 1.87-3.01 AV: 81 NL: 1.77E4  
T: ITMS + c ESI Full ms [100.00-1500.00]

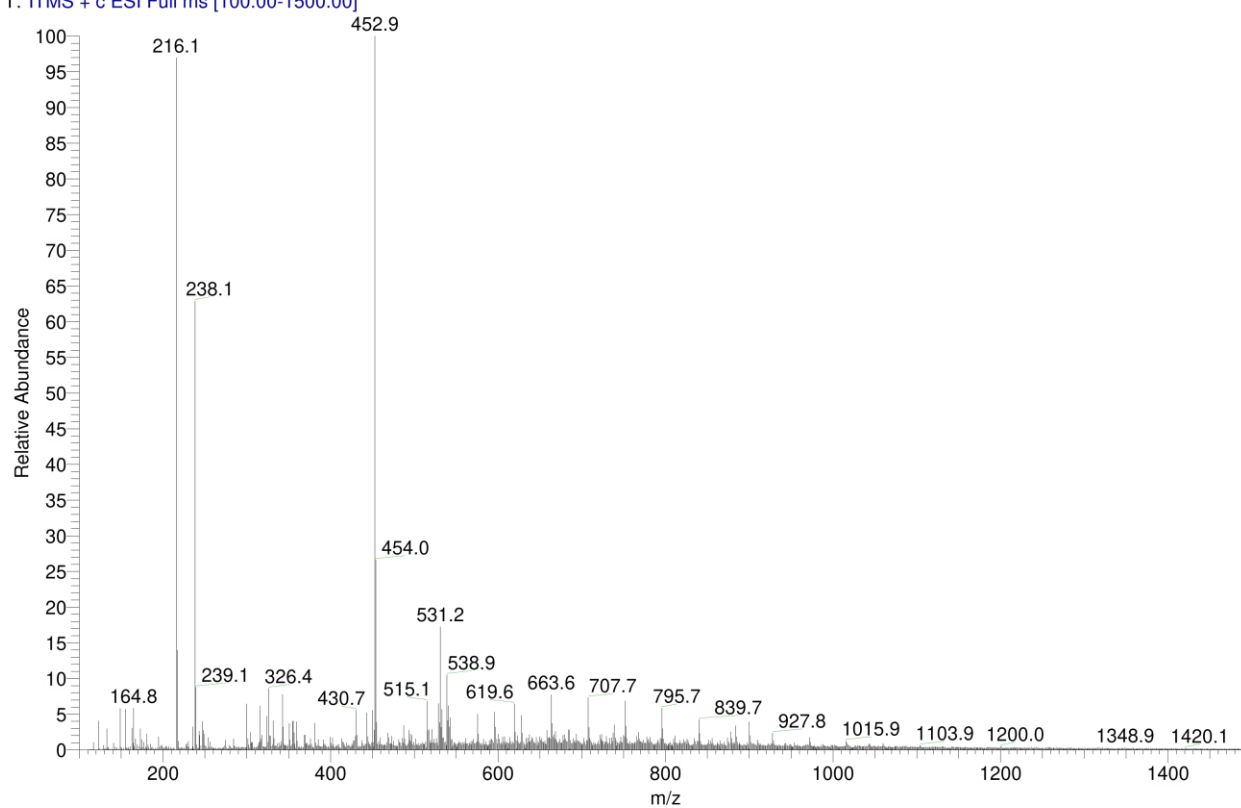

**Figure S6.** Mass spectroscopy analysis of **L<sub>2</sub>**

GN-L3 #136-211 RT: 1.93-3.00 AV: 76 NL: 6.77E4  
T: ITMS + c ESI Full ms [100.00-1500.00]

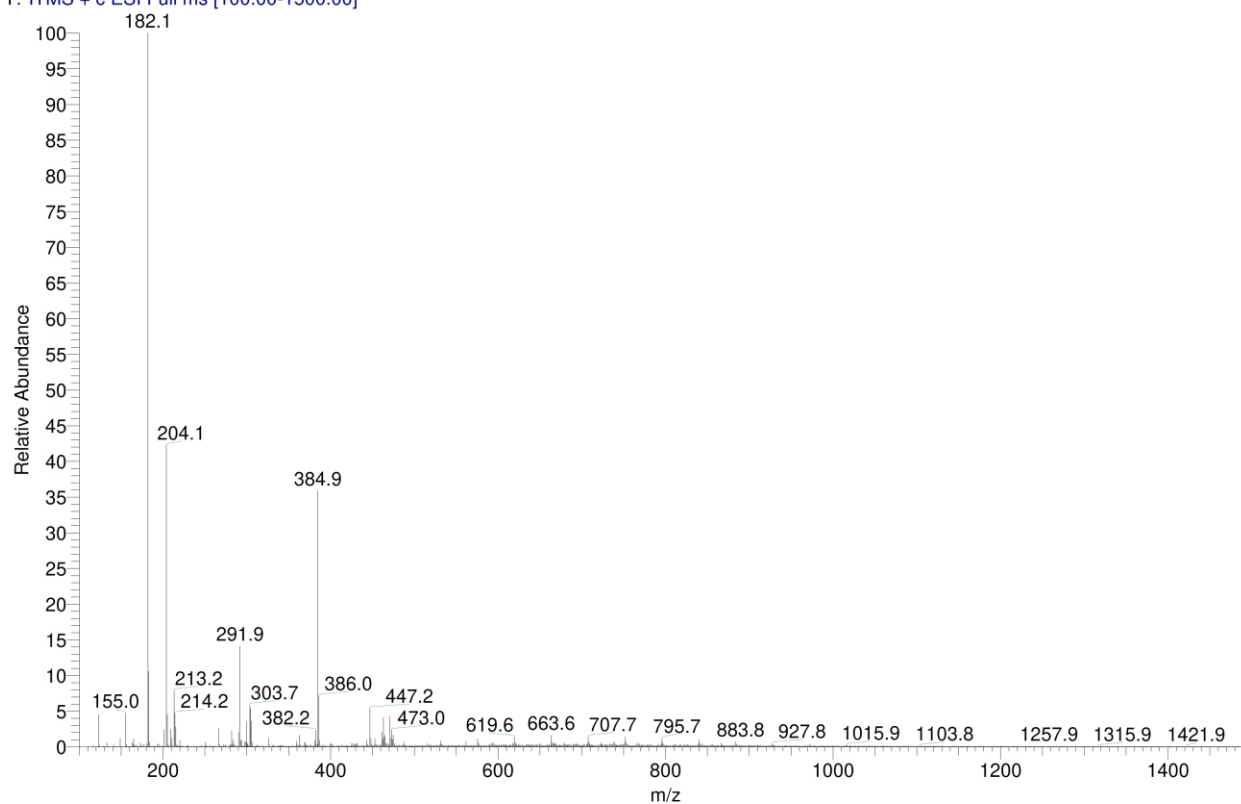

**Figure S7.** Mass spectroscopy analysis of **C<sub>1</sub>**

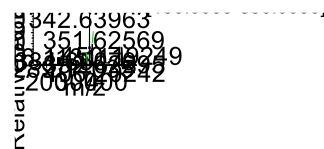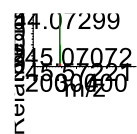

| Peak Mass | Display Formula                                                    | MS Cov. [%] | Delta [ppm] | Theo. mass |
|-----------|--------------------------------------------------------------------|-------------|-------------|------------|
| 244.07280 | C <sub>24</sub> H <sub>26</sub> O <sub>2</sub> Ni <sup>56</sup> Ni | 72.20       | -0.78       | 244.07299  |



**Figure S8.** Mass spectroscopy analysis of **C<sub>2</sub>**

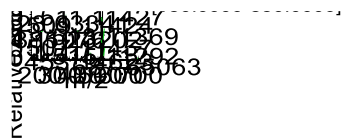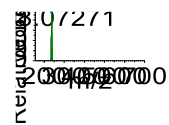

| Peak Mass | Display Formula                                                                 | MS Cov. [%] | Delta [ppm] | Theo. mass |
|-----------|---------------------------------------------------------------------------------|-------------|-------------|------------|
| 234.07423 | C <sub>18</sub> H <sub>30</sub> O <sub>2</sub> N <sub>6</sub> <sup>108</sup> Cd |             | 99.24 0.16  | 234.07419  |
